# Supplementary material
Source: publisher site journal article supplement (https://www.dovepress.com/article/supplementary_file/619125/619125%20Supplementary%20Material.docx)
Supplement: Supplementary file 1 [file 619125%20Supplementary%20Material.docx]

**Supplementary Material 1**

**Chinese Version of the Pittsburgh Sleep Quality Index (PSQI)**

**匹兹堡睡眠质量指数量表**

**说明：** 下面问题是关于您最近1个月的睡眠情况。请根据您的实际情况，选择或填写最符合的答案。

**1. 过去1个月，您通常晚上几点上床睡觉？**

______ 时 ______ 分（请按24小时制填写，例如：晚上11点 = 23时00分）

**2. 过去1个月，您通常上床后，需要多久才能入睡？**

- 0 = 15分钟以内
- 1 = 16–30分钟
- 2 = 31–60分钟
- 3 = 60分钟以上

**3. 过去1个月，您通常早上几点起床？**

______ 时 ______ 分（请按24小时制填写）

**4. 过去1个月，您每夜实际睡眠的时间有多少？**

______ 小时 ______ 分钟（不包括躺在床上但未睡着的时间）

**5. 过去1个月，您是否因为下列问题而干扰了您的睡眠？（每小项选"是"计1分，"否"计0分）**

| **项目** | **否** | **是** |
| --- | --- | --- |
| a. 不能在30分钟内入睡 | □ | □ |
| b. 夜间易醒或早醒 | □ | □ |
| c. 夜间必须起来上厕所 | □ | □ |
| d. 呼吸不顺畅 | □ | □ |
| e. 咳嗽或打鼾声很大 | □ | □ |
| f. 觉得冷 | □ | □ |
| g. 觉得热 | □ | □ |
| h. 做噩梦 | □ | □ |
| i. 身体有疼痛 | □ | □ |
| j. 其他原因，请说明：__________ | □ | □ |

**6. 过去1个月，您对自己睡眠质量的评价如何？**

- 0 = 很好
- 1 = 较好
- 2 = 较差
- 3 = 很差

**7. 过去1个月，您服用药物帮助睡眠的情况如何？（包括医生处方及自行购买之药物）**

- 0 = 无
- 1 = 每周平均不到1次
- 2 = 每周平均1–2次
- 3 = 每周平均3次或更多

**8. 过去1个月，您是否因睡眠问题而在白天感到精力不足？**

- 0 = 没有
- 1 = 轻微
- 2 = 比较明显
- 3 = 非常严重

**9. 过去1个月，您是否因睡眠问题而在白天影响工作或情绪？**

- 0 = 没有
- 1 = 轻微
- 2 = 比较明显
- 3 = 非常严重

**计分方法与标准**

**一、各成分计分**

| **成分** | **计分依据** | **得分范围** |
| --- | --- | --- |
| **I. 睡眠质量** | 第6题 | 0–3 |
| **II. 入睡时间** | 第2题 + 第5a题 | 0–3 |
| **III. 睡眠时间** | 第4题 | 0–3 |
| **IV. 睡眠效率** | 睡眠效率 = 实际睡眠时间 / 床上时间 × 100% | 0–3 |
| **V. 睡眠障碍** | 第5b–5j题累加 | 0–3 |
| **VI. 催眠药物** | 第7题 | 0–3 |
| **VII. 日间功能障碍** | 第8题 + 第9题 | 0–3 |

**二、各成分计分细则**

**II. 入睡时间**

- 0分：第2题选0分 且 第5a题选"否"
- 1分：第2题选1分 或 第5a题选"是"
- 2分：第2题选2分 或 第5a题选"是"（同时满足第2题≥2分）
- 3分：第2题选3分 或 第5a题选"是"（同时满足第2题≥3分）

**III. 睡眠时间**

- 0分：＞7小时
- 1分：6–7小时
- 2分：5–6小时
- 3分：＜5小时

**IV. 睡眠效率**

- 床上时间 = 第3题起床时间 − 第1题上床时间
- 睡眠效率 = 第4题实际睡眠时间 / 床上时间 × 100%
- 0分：≥85%
- 1分：75–84%
- 2分：65–74%
- 3分：＜65%

**V. 睡眠障碍**

- 第5b–5j题（共9项）累加得分：
- 0分：0
- 1分：1–9
- 2分：10–18
- 3分：19–27

**VII. 日间功能障碍**

- 第8题 + 第9题累加：
- 0分：0
- 1分：1–2
- 2分：3–4
- 3分：5–6

**三、总分判定**

**PSQI 总分 = I + II + III + IV + V + VI + VII**
